# Supplementary material for: Investigating the Performance of Lithium-Doped Bismuth Ferrite [BiFe1−xLixO3]-Graphene Nanocomposites as Cathode Catalyst for the Improved Power Output in Microbial Fuel Cells
Source: MDPI journal article supplement (doi:10.3390/catal13030618), 2023-03-20
Supplement: s1 [file s1]

## Investigating the Performance of Lithium-Doped Bismuth Ferrite [BiFe<sub>1-x</sub>Li<sub>x</sub>O<sub>3</sub>]-Graphene Nanocomposites as Cathode Catalyst for the Improved Power Output in Microbial Fuel Cells

Tenzin Pema <sup>1,2,†</sup>, Ankit Kumar <sup>3,†</sup>, Babita Tripathi <sup>1,2†</sup>, Soumya Pandit <sup>3,\*</sup>, Sunil Chauhan <sup>1,2,\*</sup>, Satyendra Singh <sup>4</sup>, Pritam Kumar Dikshit <sup>5</sup>, Abhilasha Singh Mathuriya <sup>6</sup>, Piyush Kumar Gupta <sup>3</sup>, Dibyajit Lahiri <sup>7</sup>, Ram Chandra Singh <sup>1,2</sup>, Jigisha Anand <sup>8</sup> and Kundan Kumar Chaubey <sup>9</sup>

<sup>1</sup> Nanomaterials Laboratory, Department of Physics, School of Basic Science and Research, Sharda University, Greater Noida 201310, Uttar Pradesh, India

<sup>2</sup> Centre for Solar Cell and Renewable Energy, Department of Physics, School of Basic Science and Research, Sharda University, Greater Noida 201310, Uttar Pradesh, India

<sup>3</sup> Biopositive Lab, Department of Life Sciences, School of Basic Science and Research, Sharda University, Greater Noida 201306, India

<sup>4</sup> Special Centre for Nanoscience, Jawaharlal Nehru University, New Delhi 110067, India

<sup>5</sup> Department of Bio-Technology, Koneru Lakshmaiah Education Foundation, Vaddeswaram 522302, Andhra Pradesh, India

<sup>6</sup> Ministry of Environment, Forest and Climate Change, Government of India, Jor Bagh, New Delhi 1100038, India

<sup>7</sup> Department of Biotechnology, School of Life Science and Biotechnology, Adamas University, Kolkata 70012635, India

<sup>8</sup> Department of Biotechnology, Graphic Era Deemed to be University, Dehradun 248002, Uttarakhand, India

<sup>9</sup> Division of Research and Innovation, School of Applied and Life Sciences, Uttaranchal University, Dehradun 248007, Uttarakhand, India

\* Correspondence: sounip@gmail.com (S.P.); sunil.chauhan@sharda.ac.in (S.C.)

† These authors contributed equally to this work

The catalytic activity of [BiFe<sub>1-x</sub>Li<sub>x</sub>O<sub>3</sub>]-graphene nanocomposite sample (x=0.02) against CIP has been studied as shown in Figure S1. No significant degradation is observed without light for x=0.02 sample.

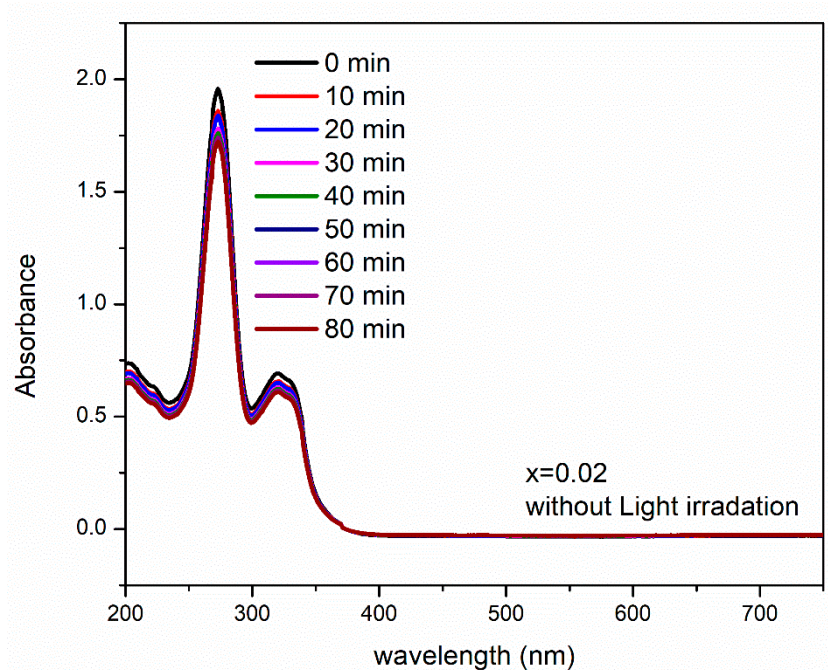

Figure S1: Catalytic degradation of CIP by using  $[\text{BiFe}_{1-x}\text{Li}_x\text{O}_3]$ -graphene nanocomposites without light irradiation for  $x=0.02$  sample.

We have also completed the studied on the structural properties of the catalysts before and after photocatalytic activity. The XRD and the FTIR results of the  $[\text{BiFe}_{1-x}\text{Li}_x\text{O}_3]$ -graphene nanocomposite are represented in Figure S2 and S3. No structural changes have been observed after the photocatalytic activity for the  $x=0.02$  sample.

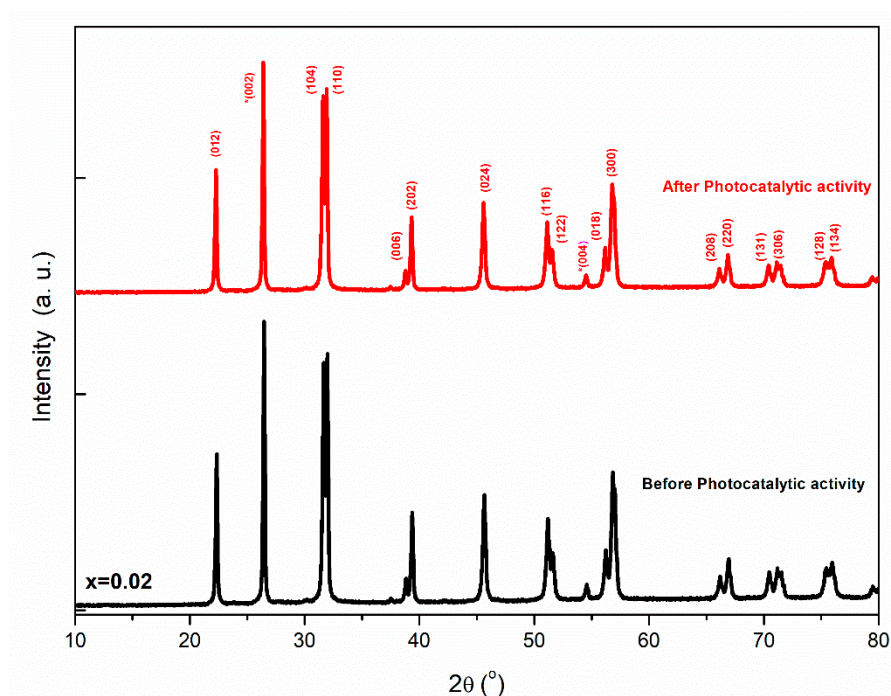

Figure S2: XRD of  $[\text{BiFe}_{1-x}\text{Li}_x\text{O}_3]$ -graphene nanocomposite before and after photocatalytic activity.

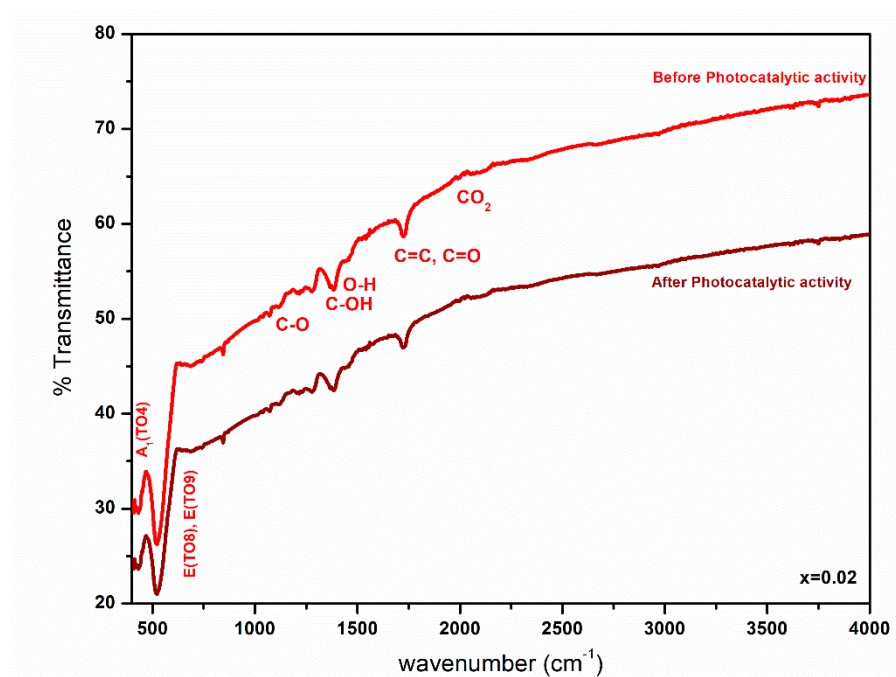

Figure S3: FTIR transmittance spectra of [BiFe<sub>1-x</sub>Li<sub>x</sub>O<sub>3</sub>]-graphene nanocomposite before and after photocatalytic activity.
