# Supplementary material for: Investigating the Performance of Lithium-Doped Bismuth Ferrite [BiFe1−xLixO3]-Graphene Nanocomposites as Cathode Catalyst for the Improved Power Output in Microbial Fuel Cells
Source: MDPI journal article supplement (doi:10.3390/catal13030618), 2023-03-20
Supplement: s1 [file s1]

Archive with 1 entries (1 files):
- catalysts-2196281-supplementary.pdf
